# Supplementary material
Source: PubMed Central journal article supplement (PMC3491138)
Supplement: NIHMS412133-supplement-1_si_001.pdf [file NIHMS412133-supplement-1_si_001.pdf]

**Supporting Information for**  
**Quantification of Biofilm-Inhibiting Antibiotic Spiked Multilayers by 7.87 eV Laser**  
**Desorption Postionization MS Imaging**

Melvin Blaze M. T., Artem Akhmetov, Berdan Aydin, Praneeth D. Edirisinghe, and Luke Hanley\*  
Department of Chemistry, MC 111, University of Illinois at Chicago, Chicago, IL 60607

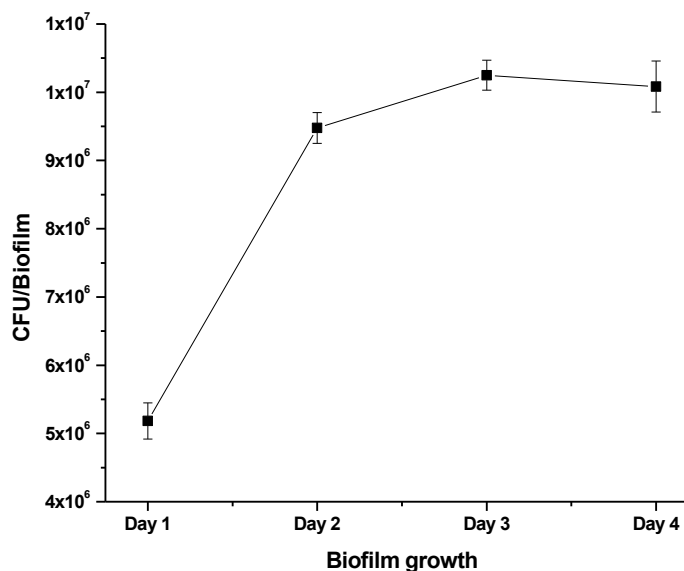

Figure S1: *E. faecalis* colony biofilm growth curve.

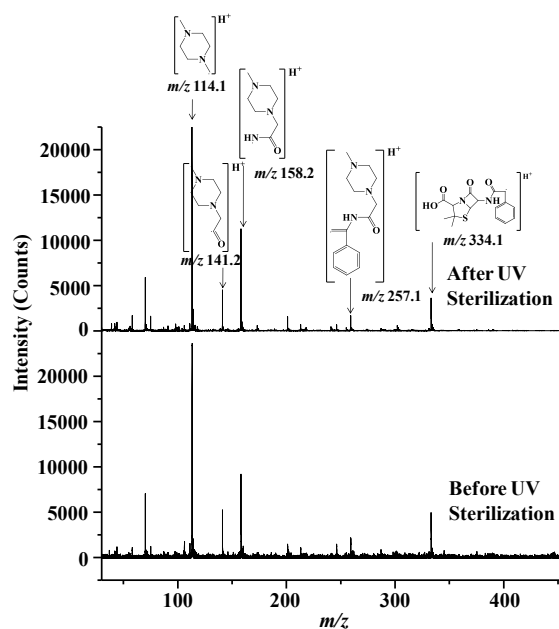

Figure S2: MALDI-MS/MS of the  $m/z$  490.2 protonated parent from MPA-ampicillin adsorbed on chitosan-alginate polyelectrolyte multilayers before and after UV sterilization.

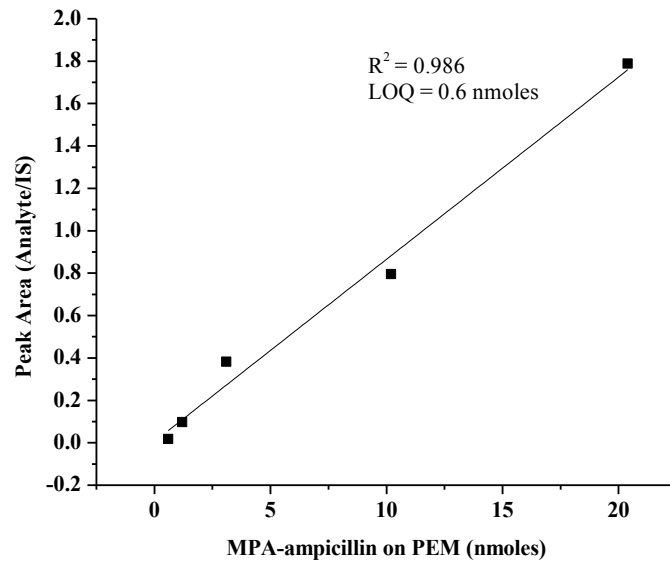

Figure S3: Linear regression plot for MPA-ampicillin adsorbed on chitosan-alginate polyelectrolyte multilayers with sulfadiazine as internal standard.
